# Supplementary material for: The role of 18F-FDG PET/CT in predicting the pathological response to neoadjuvant PD-1 blockade in combination with chemotherapy for resectable esophageal squamous cell carcinoma
Source: Research Square preprint supplement (doi:10.21203/rs.3.rs-1593584/v1), 2022-05-09

**Supplemental figure 1** Receiver operator characteristic (ROC) curve for scan-2 metabolic parameters for diagnosing tumor pathological complete response.


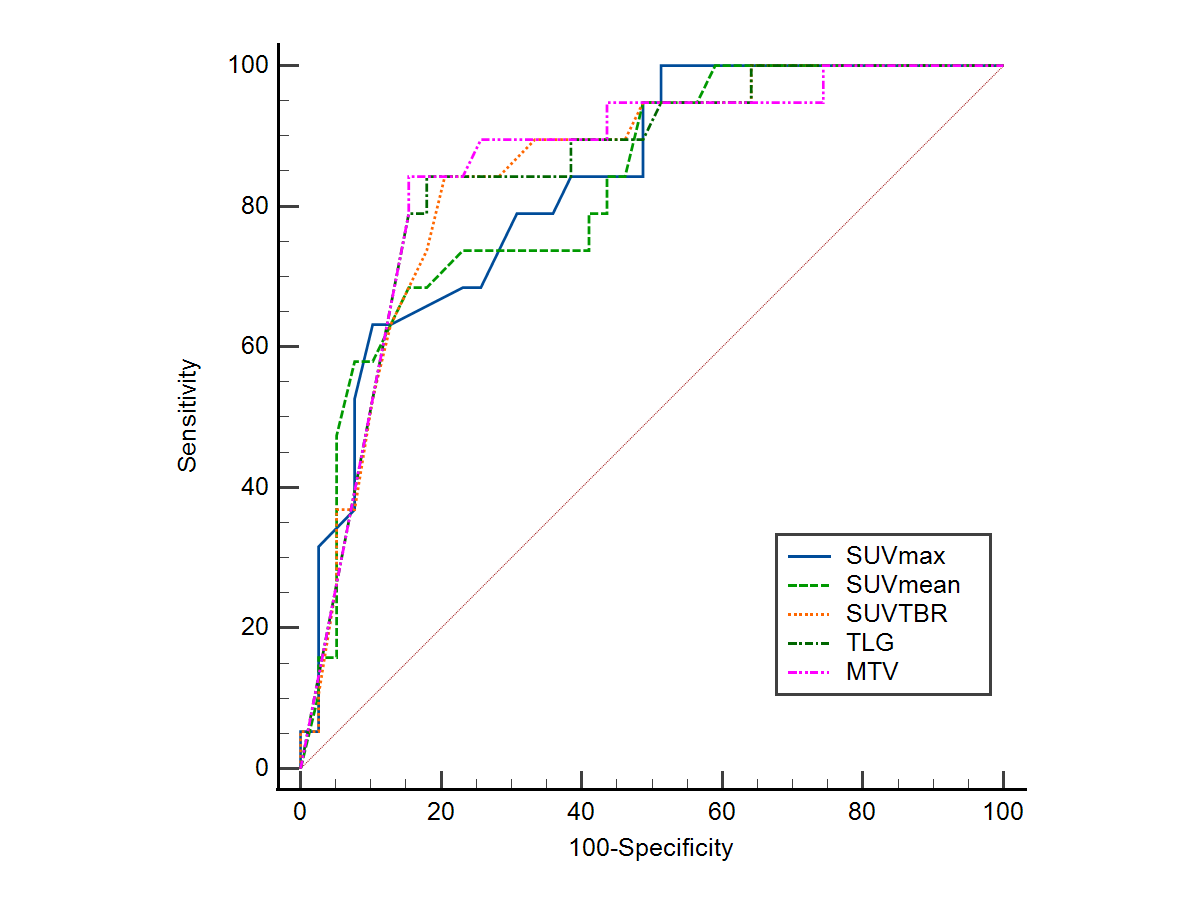


**Supplemental table 1** *P* value from Delong test in comparison of ROC curves for tumor metabolic parameters of scan-2 to predict tumor pathological complete response.

| Variable | SUVmax | SUVmean | SUVTBR | TLG | MTV |
| --- | --- | --- | --- | --- | --- |
| SUVmax | - | 0.881 | 0.829 | 1.000 | 0.872 |
| SUVmean | 0.881 | - | 0.917 | 0.929 | 0.938 |
| SUVTBR | 0.829 | 0.917 | - | 0.857 | 0.965 |
| TLG | 1.000 | 0.929 | 0.857 | - | 0.582 |
| MTV | 0.872 | 0.938 | 0.965 | 0.582 | - |
| SUVmax, maximum standardized uptake value; SUVmean, mean standardized uptake value; SUVTBR, the tumor-to-blood pool SUVmax ratio; MTV, metabolic tumor volume; TLG, total lesion glycolysis. | | | | | |

**Supplemental figure 2** Spearman correlation matrix for metabolic parameters of 18F-FDG PET/CT.


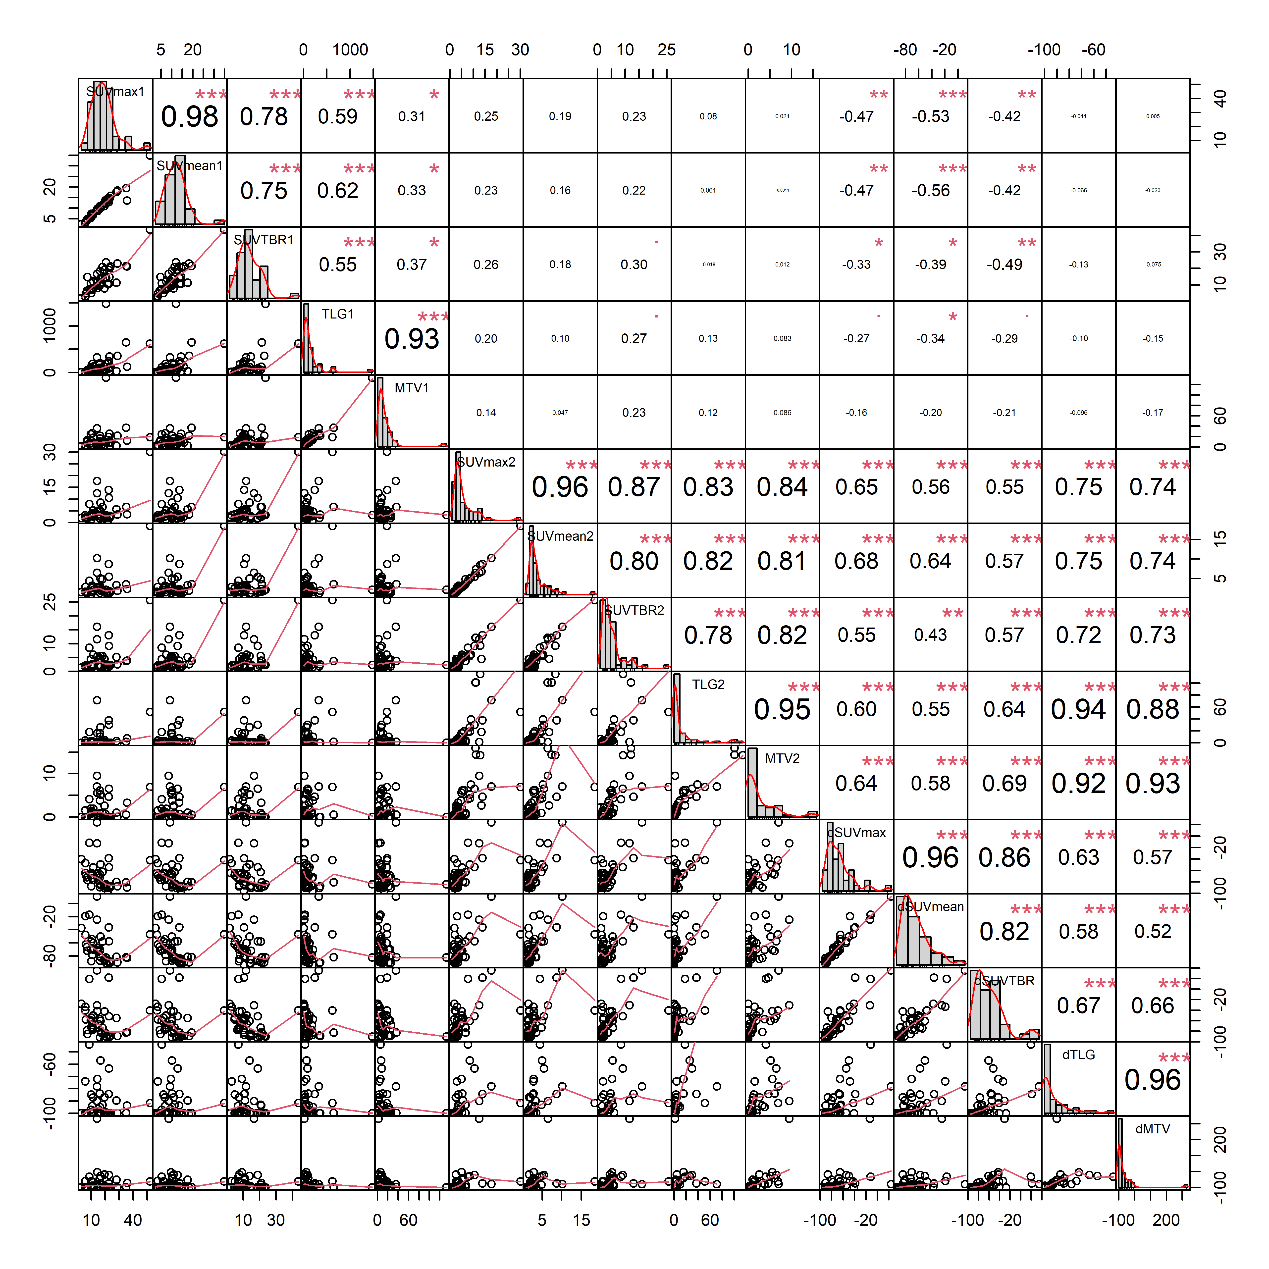


**Supplemental table 2** Collinearity diagnostics for metabolic parameters in logistic regression models.

| Variables | VIF | Tolerance |
| --- | --- | --- |
| MTV of scan-1 | 1.085 | 0.921 |
| SUVmax of scan-2 | 1.202 | 0.832 |
| ΔMTV% | 1.257 | 0.795 |
| VIF, variance inflation factor; MTV, metabolic tumor volume; SUVmax, maximum standardized uptake value. | | |

**Supplemental table 3** *P* value from Delong test in comparison of ROC curves for univariable and multivariable metabolic parameters to predicting tumor pathological complete response.

| Variable | MTV of scan-1 | SUVmax of scan-2 | ΔMTV% | Multivariable |
| --- | --- | --- | --- | --- |
| MTV of scan-1 | - | 0.274 | 0.700 | **0.034** |
| SUVmax of scan-2 | 0.274 | - | 0.193 | 0.307 |
| ΔMTV% | 0.700 | 0.193 | - | 0.060 |
| Multivariable | **0.034** | 0.307 | 0.060 | - |
| MTV, metabolic tumor volume; SUVmax, maximum standardized uptake value. | | | | |

**Supplemental figure 3** Receiver operator characteristic (ROC) curve for univariable and multivariable metabolic parameters for predicting tumor pathological complete response.


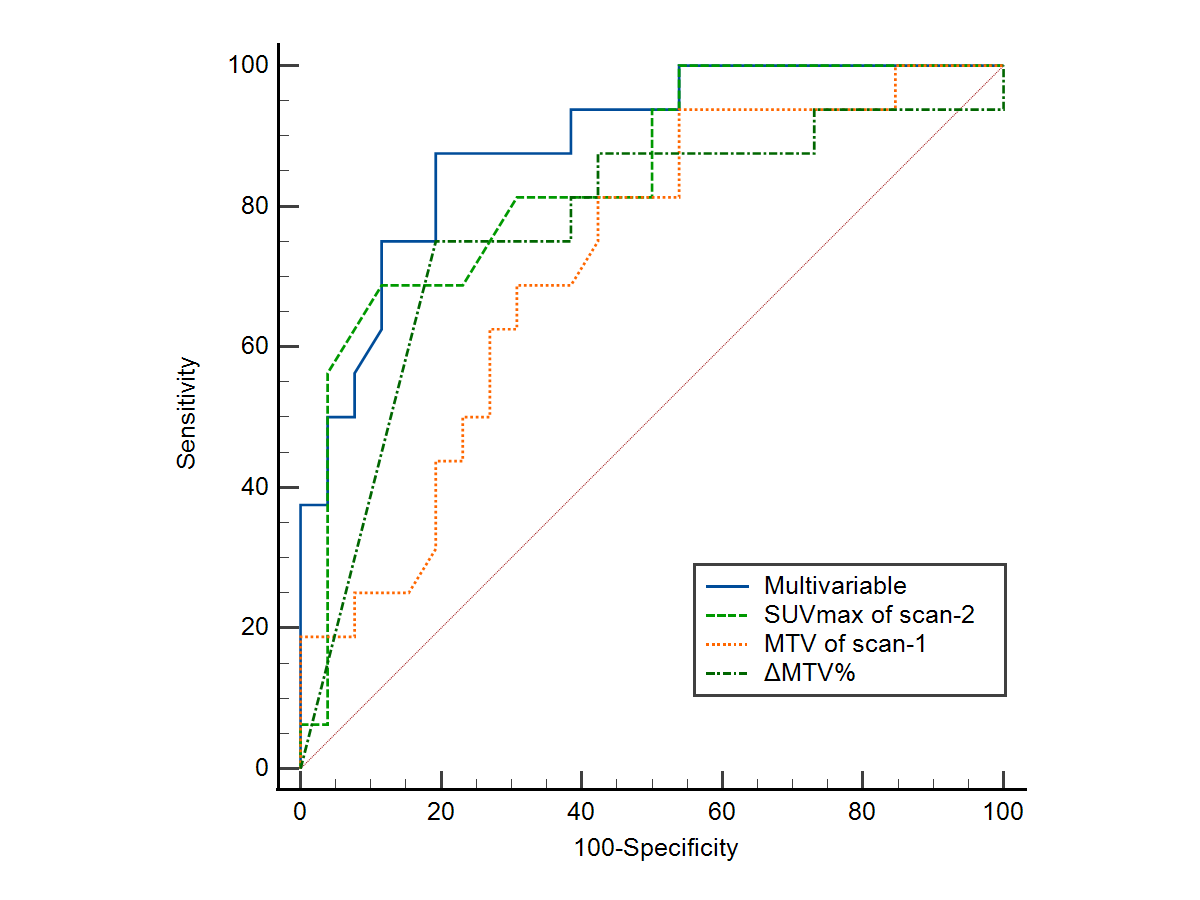


**Supplemental table 4** *P* value from Delong test in comparison of ROC curves for lymph node parameters in scan-1 to predict lymph node involvement.

| Variable | SUVmax | SAD | SUVmax+SAD |
| --- | --- | --- | --- |
| SUVmax | - | 0.412 | 0.312 |
| SAD | 0.412 | - | 0.959 |
| SUVmax+SAD | 0.312 | 0.959 | - |
| SUVmax, maximum standardized uptake value; SAD, short axis diameter. | | | |

**Supplemental table 5** *P* value from Delong test in comparison of ROC curves for lymph node parameters in scan-2 to predict lymph node involvement.

| Variable | SUVmax | SAD | SUVmax+SAD (scan-2) | SUVmax+SAD (scan-1) |
| --- | --- | --- | --- | --- |
| SUVmax | - | **0.014** | 0.333 | - |
| SAD | **0.014** | - | **0.009** | - |
| SUVmax+SAD (scan-2) | 0.333 | **0.009** | - | 0.918 |
| SUVmax+SAD (scan-1) | - | - | 0.918 | - |
| SUVmax, maximum standardized uptake value; SAD, short axis diameter. | | | | |

**Supplemental figure 4** Receiver operator characteristic (ROC) curve for scan-1 (**a**) and scan-2 (**b**) parameters for regional lymph nodes metastasis after neoadjuvant therapy.


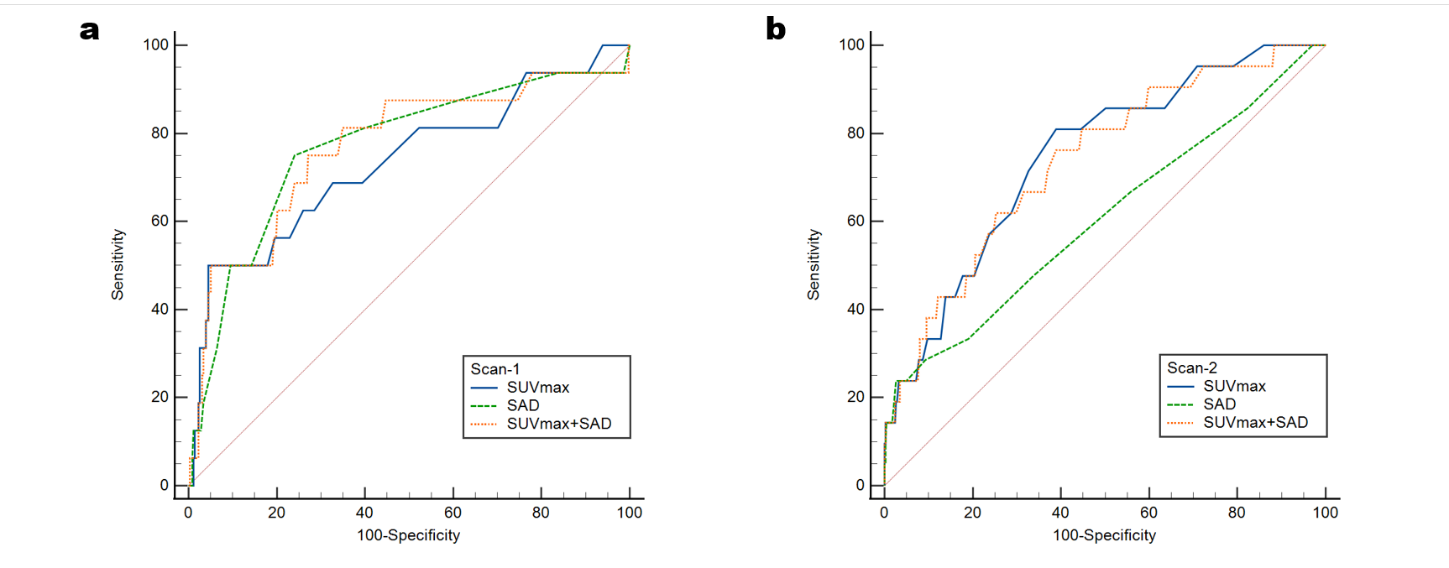

Supplement: Supplementary file 1 [file 086d0f725b285cb26a06e58b.docx]
